# Supplementary material for: Association between pelvic inflammatory disease and infertility in American women : Results from the National Health and Nutrition Survey 2013 to 2018
Source: Research Square preprint supplement (doi:10.21203/rs.3.rs-5235729/v1), 2025-04-28
Supplement: Supplementary file 1 [file 861b0be3f4c9e60bd73e08c9.docx]

Supplemental Table 1 Univariate regression analysis

| Variable | OR_95CI | *P* |
| --- | --- | --- |
| Age | 1.05 (1.03, 1.07) | <0.001 |
| Race/ethnicity |  |  |
| Mexican American | 1.00 (Reference) |  |
| Non-Hispanic white | 0.98 (0.7, 1.37) | 0.888 |
| Non-Hispanic Black | 1.01 (0.7, 1.45) | 0.979 |
| Other Race-Including Multi-Racial | 0.79 (0.55, 1.13) | 0.188 |
| Marital status |  |  |
| Married/Living with partner | 1.00 (Reference) |  |
| Separated/Divorced/Widowed/Never Married | 0.5 (0.39, 0.65) | <0.001 |
| Education |  |  |
| Less than high school | 1.00 (Reference) |  |
| High School or equivalent College or over | 0.94 (0.68, 1.3) | 0.714 |
| PIR | 1.06 (0.99, 1.14) | 0.121 |
| BMI | 1.04 (1.02, 1.05) | <0.001 |
| Drinking |  |  |
| No | 1.00 (Reference) |  |
| Yes | 1.14 (0.89, 1.47) | 0.296 |
| Smoking |  |  |
| No | 1.00 (Reference) |  |
| Yes | 1.31 (1.02, 1.68) | 0.035 |
| Ever been pregnant |  |  |
| No | 1.00 (Reference) |  |
| Yes | 2.23 (1.64, 3.03) | <0.001 |
| Ever use female hormones |  |  |
| No | 1.00 (Reference) |  |
| Yes | 1.47 (0.77, 2.83) | 0.245 |
| Ever use birth control pills |  |  |
| No | 1.00 (Reference) |  |
| Yes | 1.39 (1.07, 1.8) | 0.013 |
| PID |  |  |
| No | 1.00 (Reference) |  |
| Yes | 2.52 (1.66, 3.83) | <0.001 |

OR, odds ratio ; 95 % CI, 95 % confidence interval.

Supplemental Table 2 Multivariate regression analysis of the association between pelvic inflammatory disease (PID) and infertility in NHANSE 2013–2016.

| Variable | Non-infertility  OR (95%CI) | Infertility  OR (95%CI) | *P*-value |
| --- | --- | --- | --- |
| Model I | 1(Ref) | 2.87 (1.73, 4.76) | <0.001 |
| Model II | 1(Ref) | 2.88 (1.71, 4.88) | <0.001 |
| Model III | 1(Ref) | 2.85 (1.68, 4.84) | <0.001 |
| Model IV | 1(Ref) | 2.72 (1.59, 4.65) | <0.001 |
| Model V | 1(Ref) | 2.65 (1.53, 4.59) | 0.001 |

Model I : No adjustment.

Model II : Adjusted for model I + age + race/ethnicity + education level + marital status + PIR.

Model III : Adjusted for Model II + smoking + drinking.

Model IV : Adjusted to Model III + BMI + ever been pregnant + ever use birth control pills + ever use female hormones

Model V : Adjusted to Model IV+ Age at first vaginal sex + Number of lifetime vaginal sex + Use protection when performing oral sex

OR, odds ratio ; 95 % CI, 95 % confidence interval.

Supplemental Table 3 Multivariate regression analysis of the association between pelvic inflammatory disease (PID) and infertility

| Variable | Non-infertility  OR (95%CI) | Infertility  OR (95%CI) | *P*-value |
| --- | --- | --- | --- |
| Model I | 1(Ref) | 2.12 (1.28, 3.5) | 0.003 |
| Model II | 1(Ref) | 1.91 (1.14, 3.19) | 0.015 |
| Model III | 1(Ref) | 1.82 (1.08, 3.06) | 0.025 |
| Model IV | 1(Ref) | 1.81 (1.07, 3.05) | 0.026 |

Model I : No adjustment.

Model II : Adjusted for model I + age + race/ethnicity + education level + marital status + PIR.

Model III : Adjusted for Model II + smoking + drinking.

Model IV : Adjusted to Model III + BMI + ever been pregnant + ever use birth control pills + ever use female hormones

OR, odds ratio ; 95 % CI, 95 % confidence interval.
